# Supplementary material
Source: PubMed Central journal article supplement (PMC3173228)
Supplement: supp_M111.268904_jbc.M111.268904-1.pdf [file supp_M111.268904_jbc.M111.268904-1.pdf]

## Supplementary Figure Captions

**Fig. S1. Isothermal titration calorimetry results for the binding of biogenic amine ligands with LJM-11, LJM-17 and LJM-111.** The upper panel of each graph shows the heat changes with each injection as a function of time. The lower panel shows a plot of the calculated enthalpies per injection versus molar ratio of ligand and target (squares). Also shown is the result of fitting the data to a single site binding model using the MicroCal origin software package. Panels 1-6: LJM11; Panels 7-12: LJM111; Panels 13-16: LJM-11 T328A mutant; Panels 17-20: LJM-11 N343A mutant. Below each graph the concentration of the protein in the calorimeter cell (P) and the ligand in the syringe (L) are shown.

**Fig. S2. Stereoview of the LJM-11 binding pocket containing serotonin with the ligand covered by a Fo-Fc difference electron density map (colored in blue).** The map was calculated using data collected from LJM-11 cocrystallized with serotonin. Protein carbon atoms are colored in white, nitrogen in blue and oxygen in red. Carbon atoms in serotonin are colored in green, with nitrogen colored in blue and oxygen in red. Hydrogen bonds are shown as red dashed lines.

**Fig. S3. Alignment of phlebotomine salivary yellow proteins retrieved by a search of the GenBank protein database using the motif shown in Fig. 5A.** Residues contained in the motif are shown highlighted in black or yellow. Absolutely conserved motif positions are marked by an asterisk, while motif positions that are not absolutely conserved are marked by a colon. The conserved cysteine positions are highlighted in blue. Abbreviations: PHLARI, *Phlebotomus ariasi*, PHLARA, *P. arabicus*, PHLPER, *P. perniciosus*, PHLARG, *P. argentipes*, PHLDUB, *P. dubosqi*, PHLPAP, *P. papatasi*, LUTLON, *L. longipalpis*.

**Fig. S4. Chromatography of T328A and N343A mutants of LJM-11 on Superdex-75 in comparison to the wild-type protein.** The retention volumes of the mutants are essentially identical to the wild type, with no indication of high molecular weight aggregates being seen.

Fig. S1

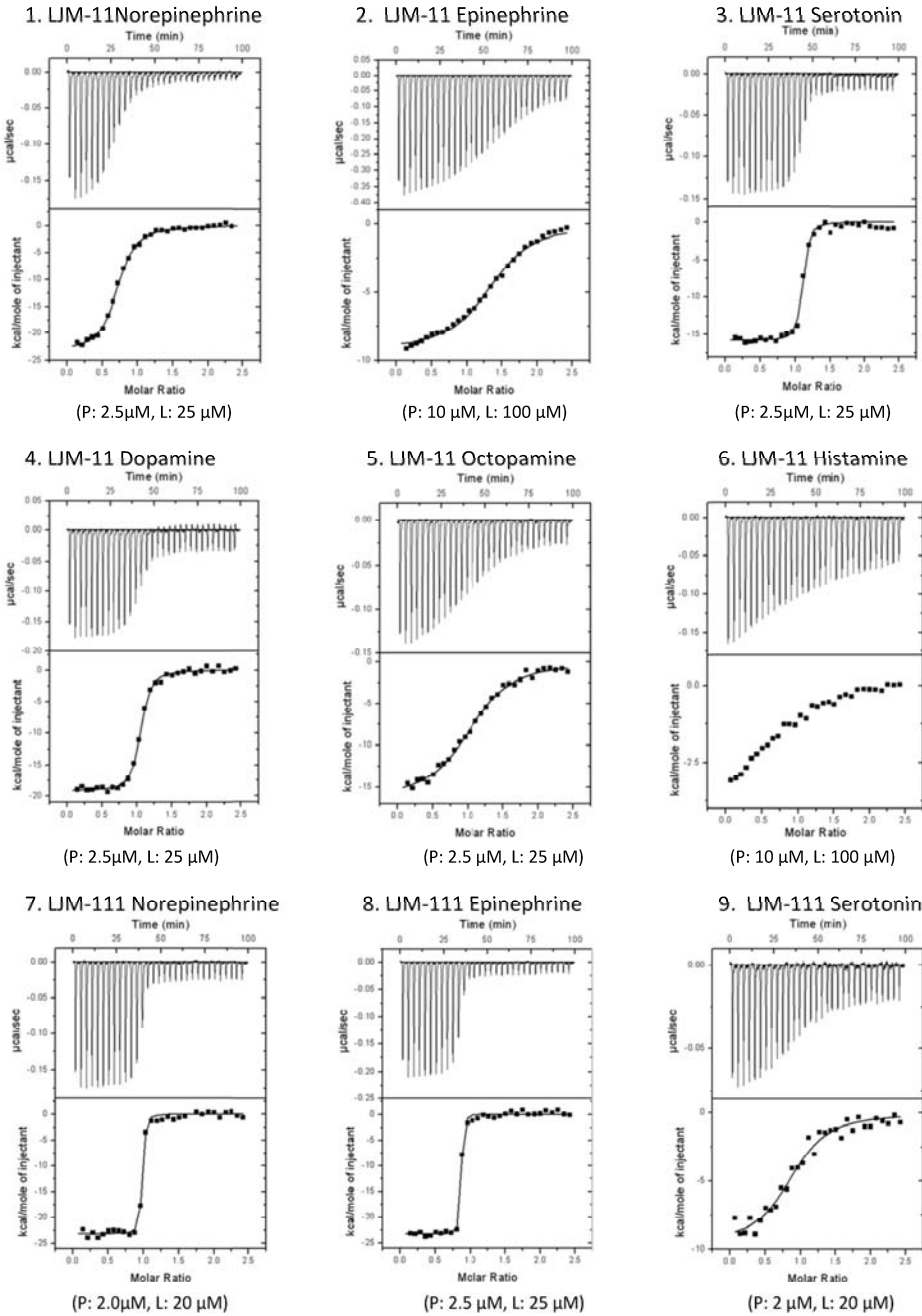

Fig. S1 (page 2)

10. LJM-111 Dopamine

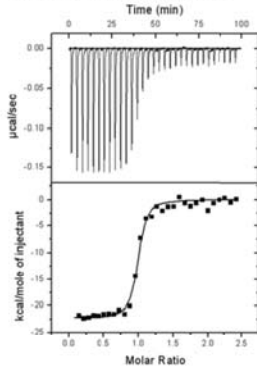

(P: 2.0 µM, L: 20 µM)

11. LJM-111 Octopamine

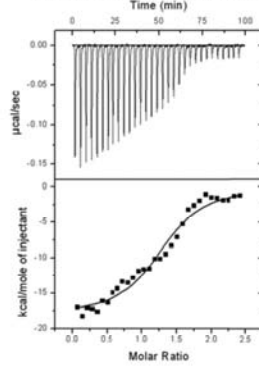

(P: 2.5 µM, L: 25 µM)

12. LJM-111 Histamine

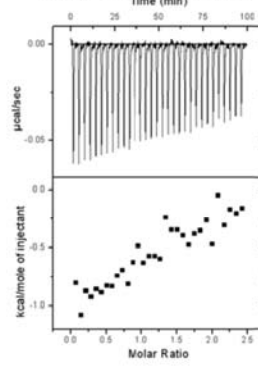

(P: 10 µM, L: 100 µM)

13. T328A Norepinephrine

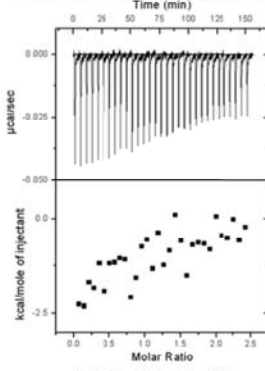

(P: 2.5 µM, L: 25 µM)

14. T328A Epinephrine

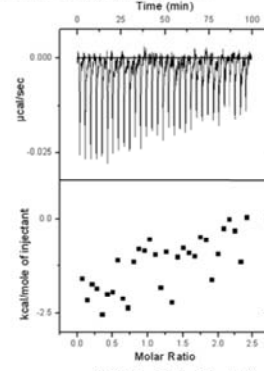

(P: 2.5 µM, L: 25 µM)

15. T328A Serotonin

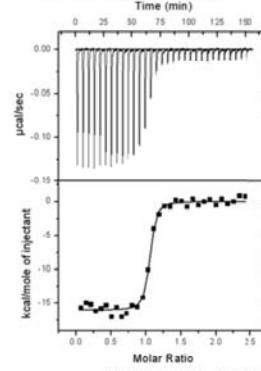

(P: 2.5 µM, L: 25 µM)

16. T328A Dopamine

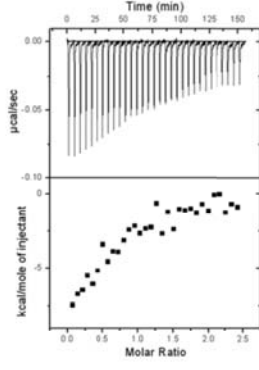

(P: 2.5 µM, L: 25 µM)

17. N343A Norepinephrine

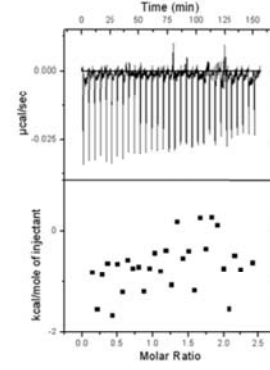

(P: 2.5 µM, L: 20 µM)

18. N343A Epinephrine

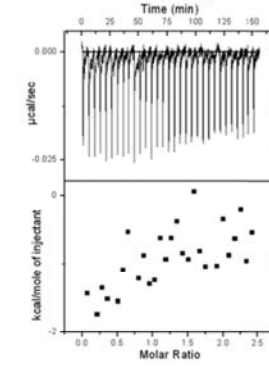

(P: 2.5 µM, L: 25 µM)

Fig. S1 (page 3)

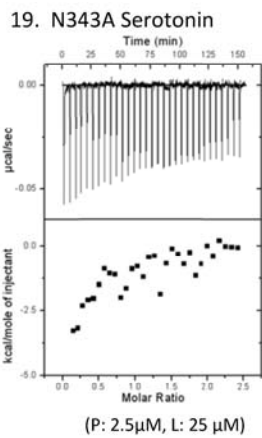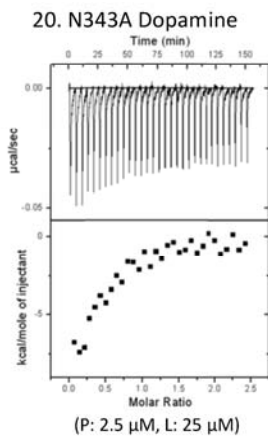

Fig. S2

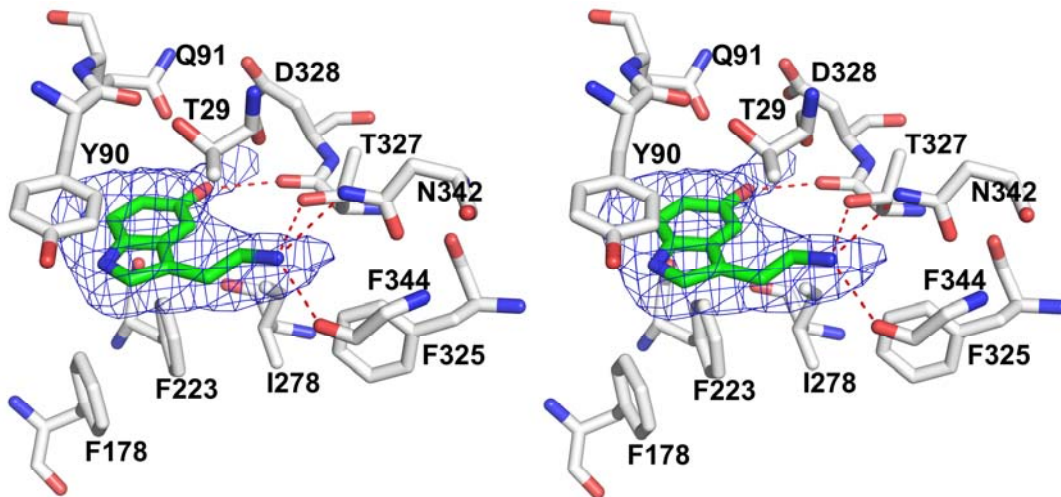

Fig. S3 (page 1)

```
PHLARI_61373243 -MKIFMGLIAVVS LQGALAYHVEREYAWKNITFEGIDQASYNIENTIPAFVHDALSKKI
PHLARA_242564631 -MKIFLCLFAVVS FHGAFAYHVEREYAWKNITFEGIDQASYNIENTIPAFVHDALSKKI
PHLPER_76446591 -MKIFLCLIAVVS LQGVVGFHVEREYAWKNISYEGVDPALFNIDNIPAFVHDAINKKI
PHLARI_61817273 -MKIFLCLFAAVS IQGALASQIEREYAWKNITFEGIDQGSYNIENSIPAFVHDAASKKI
PHLPER_76446589 -MKIFLCLIAVVS LQGVLYDIEREYAWKNISFEGIDPASYSVKNISIPAFVHDAASKKI
PHLARG_74486543 -MKWFLFLLS TIFVQGLGYHVEREYAWRNVT FEGVNPSSYNVLSHISIPAFVHDAETQKL
PHLDUB_112361963 -MKFFILSVLALAS FQHVFCDDVERAYAWRNISFVDTRREGTYNPEVDIIPAFVTHDAKTKKL
PHLPER_15963519 -MKFFILSVLALAS FQVFCDDVEREYAWRNITFEDVREGTYKPGVDIIPAFVTHDAKTKKL
PHLDUB_112497236 -MKLILTVLAFSL QVALSDDVGRLEYWSKIDIVGVSPSYVSSNIIPAFVAYDADSKML
PHLDUB_112361969 -MKLILTVLAFSL QVALSDDVGRLEYWSKIDIVGVSPSYVSSNIIPAFVAYDADSKML
PHLPAP_15963517 MMKLLICVLSFSL QVALSDDVGRAYEWESEIKLVGRVNPAYDSGNIVPAGVAYDAASKML
LUTLON_4887116 -MRFFFVFLAIVL FQGIHGAYVEIGYSLRNITFDGLTDDYNPKFNIPAGLAVDPEGYRL
LUTLON_41397462 -MKVFFSIFTLV LFGQTLGADT-QGYKWKQLLYNNVTPGSYNPDNMSIPAFAYDAEGEKL
LUTLON_77696451 -MKLFFFLYTFGL VQTI FGVGEIKQGFKNKILYEGDTS ENFNPDNNILIPAFAYDPESQKL
*

PHLARI_61373243 IIAIPRLYPQVPITL TQLDTTKHPE---RSPP---LEKFFPG---SDKLTSVYQVEMLDIC
PHLARA_242564631 FITIPRRYPQVPITL TELDTSKHPE---RSPP---LSKFFPG---SDDLINVYQVVIDIC
PHLPER_76446591 FIAVPRRSFPQIPF TLELDTTKHPE---RSPP---LSKFFPG---SDKLINVYQVVIDIC
PHLARI_61817273 FITIPRLIN-QVPITL TEFDSIKYPG---GSPP---LSKFFPG---SDNIIISVYQVVIDIC
PHLPER_76446589 FITIPRLIN-PVPITL TLELDTTKHPE---GSPP---LSKFFPG---SDKLISVYQVVIDIC
PHLARG_74486543 FVAVPRRYQPVPHTL TEIERKKHPE---RSPP---LSKFSGKS-SKDLISVYQVVIDIC
PHLDUB_112361963 YFGVPRLYNPITYL AEIDTNKYNSSSEIRSP---FSKFNSSQ-GKEFTSYQVVIDIC
PHLPER_15963519 YFGVPRRYSNIPYTL AEIDTRNYSSEIRSP---FSKFNSSQ-GKEFTSYQVVIDIC
PHLDUB_112497236 FFGLPKRKYSKVPIT VAQLSTRSYNSAERRDPP---LDKFSGKS-KKPLTSVYQVVIDIC
PHLDUB_112361969 FFGLPKRKYSKVPIT VAQLSTRSYNSAERRDPP---LDKFSGKS-KKPLTSVYQVVIDIC
PHLPAP_15963517 FFGIPRIYSRVPIT FAQLSTRSYNSAEIPNPF---LDKFSGKS-KQPLTSVYQVVIDIC
LUTLON_4887116 FIAIPRRKPKVPYTT VAEINMVMNPGFPVERAPSF EKFKFNNGEG-KKDLVNVYQVVIDIC
LUTLON_41397462 FLAVPRKLPVRYTTL AEVDTKNSLGVKVKHSP---LLNKFSGHKTGKELTSYQVVIDIC
LUTLON_77696451 FLTVPKYPETMYTL AEVDTKNSFESGDTSP---LLGKFSGHKTGKELTSYQVVIDIC
**

PHLARI_61373243 RRLWIVDVGVQVEYKG-DEQKYPKKNPAI IAYDLTKDNYPEIDRYEIPINIAG-NQIGFGG
PHLARA_242564631 RRLWIVDAGEVEYKG-DEQKYPKRSAAI IAYDLTKNNYPEIGRYEIPRKISG-NPLGFGG
PHLPER_76446591 RRLWIVADVGRVDYKG-DEQKYPNQNAVLI AYDLTKENYPEIHRYEIPSKIAGSNTIPFGG
PHLARI_61817273 RRLWIVDAGQVEYKG-DEQKYPKKNPAI IAYDLTKDNYPEIDRYEIPINIAG-NPLGFGG
PHLPER_76446589 RRLWIVDAGQVEYKG-DEQKI PKKNAAI IAYDLTKDNYPEIDRYEIPNNVAG-NPLGFGG
PHLARG_74486543 RRLWVVDVGMVDYKKG-QPKYRKQNPAAI IADFLTKENYPEVDRYELPAEVVK-NPLSFGC
PHLDUB_112361963 RRLWVLDVGEADYKKG-NGNEYPTKNPEI IADFLNQEGNPEVHRKYKLEGDVAK-TPLGFGG
PHLPER_15963519 RRLWVLDVGVQVDYKKG-HCNEYPTKNPEI IADFLNQEGNPEVHRKYKLEGDVAK-SPLGFGG
PHLDUB_112497236 RRLWVLDVGVIVEVEA-ERKTYPTKNPAL VAFDLTKPNYPEIHRYEELTGNAAK-TPLGYGG
PHLDUB_112361969 RRLWVLDVGVIVEVKA-ERKTYPTKNPAL VAFDLTKPDYPEIHRYEELTGDAAK-TPLGYGG
PHLPAP_15963517 RRLWVLDVGVIVENEA-ERKTYPTKPSL IADFLTKSNYPEIHRYEELTGEAGK-NPLGYGG
LUTLON_4887116 RRLWVLDIGKVEYTTGGDADQY PKGKPTL IAYDLKNDHTEPIHRFEIPDDLYS-SQVEFGG
LUTLON_41397462 RRLWVVDIGSVYRSRGAQDYP SHRPAI VAYDLKQPNYPEVVRFEYFPTRLVE-KPTYFGG
LUTLON_77696451 HRLWVVDVGSVERNSDGT EGQPEHNPTL VAYDLKEANYPEVIRYTFPDNSIE-KPTFLGG

PHLARI_61373243 FTVDVTPKKECG---KTFIYITNE EDNTLIVYDQEKKDSWKISHGSFKPE-HESNFSHN
PHLARA_242564631 FTIDVTPTECG---KTFIYITNE EDNTLIVYDQEKKDSWKISHGSFKPE-HDSVLTHN
PHLPER_76446591 FAVDVTNPKECG---KTFVYITNE EDNTLIVYDQEKKDSWKISHGSFKPE-HDSTLSHD
PHLARI_61817273 FTVDVTPKKECG---KTFIYITNE EDNTLIVYDQEKKDSWKISHGSFKPE-HESLIIHN
PHLPER_76446589 FAVDVTNPKECG---KTFVYITNE EDNTLIVYDQEKKDSWKISHGSFKPE-HESLIIHN
PHLARG_74486543 FAVDVINPKGDCS---DTFLYITNE EENTIVVYDKNKASWKVSHDSFKPE-KDVIIVLD
PHLDUB_112361963 FAVDVINPNMGNCATSDETYLYITNE IDNALIVYDMKNRNNAWKINDSFKPEPGKSVENHK
PHLPER_15963519 FAVDVINPNMGNCATSDETYLYITNE IDNALIVYDMKNRNNAWKINDSFKPEPGKSVENHK
PHLDUB_112497236 FAVDVINPKKCKNDKTYVYI ANFVENS LIVYDKKSDAWLKDSSFKPE-GVSTYTHN
PHLDUB_112361969 FAVDVINPKKCKNDKTYVYI ANFVENS LIVYDKKSDAWLKDSSFKPE-GVSTYTHN
PHLPAP_15963517 FAVDVINPKRCSBKNEKTYIYI ANFVENS LIVYDKKSGEAWLKDSSFKPE-GVTYTLN
LUTLON_4887116 FAVDVNTKGDCT---ESFVYITNE EDNTLIVYDQEKKDSWKISHGSFKPE-KESTFSYS
LUTLON_41397462 FAVDVANPKGDCS---ETFVYITNE LRGALFIYDHKKQDSWNVHTPTFKAE-RPTKFDYG
LUTLON_77696451 FAVDVVKPD-ECS---ETFVYITNE LTNALIVYDHNKDSWTVQDSTFGPD-KRSKFDH
:

PHLARI_61373243 G-AQYKYKAGIEGITL GDRDPEGNRPAYYLGGSSTKLFEVSTEALKKKGAKFDPVRLGDR
PHLARA_242564631 G-KEHKYKVGIEGITL GDRDPEGNRPAYYLGGSSTKLFEISTEYLLKKKGAKFDPVRLGDR
PHLPER_76446591 G-QYKYRVGIEGITL GDRDPEGNRPAYYIAGSSTKLFEISTRIKLEKKGAKFDPVNLGNR
PHLARI_61817273 G-VDHILKLGIEGITL GDRDSEGNRPAYYLGGSSTKLFEVNTKALKKKEGIEPTLGDOR
PHLPER_76446589 G-AOHLKLGIEGITL GDLDEGNROAYLGGSSTKLFRVNTKDLKKKAGOEIETPLGDOR
PHLARG_74486543 GGKYSYKVGIEGITL GDRDREAGNRMAYYLGGSSTKLYKYSTGALKKKGAKFDPVRLGDR
PHLDUB_112361963 G-EYTYYSVIEGITL GDRDKDGHRLAYLAGSSTKLVYVNTANLKKKVKSLKPTLLGER
```

Fig. S3 (page 2)

```
PHLPAP_15963519      G-EQYSYIAGIEGITLGDNRKDGHRPAYIAGSSTKVYSVNTASLKEKGASLKPRLIGER
PHLDUB_112497236    G-KEHKLETGIEGIALGDRNKEGNRPAYLAGSSTKLYRLDTKLLKKKGSKLVPKLIGDR
PHLDUB_112361969    G-KEHEKLTGIEGIALGDRNKEGNRPAYLAGSSTKLYRLDTKLLKKKGSKLVPKLIGDR
PHLPAP_15963517      G-KEHKFKAGIEGIALGDRNKEGNRPAYLAGSSTKLYRLDTKLLKKKGSKLEPKLIGDR
GEEQMKYKVGIEGIALGDRDEMGRHPACYIAGSSTKVYSVNTKELKKTENGQLNPQLHGDR
LUTLON_4887116      G-KEYEFKAGIEGITLGDURKEGNRPAYLAGSAIKVYSVNTKELKQKGGKLNPELLGNK
LUTLON_41397462    G-QQYEYBAGIEGITLGERDNEGNRQAYYLVASSTKLHSINTKELKQKGSKVNANYLGR
LUTLON_77696451

PHLARI_61373243      GRHTEALALVYDPKTKVIFFAESDSRQVSCWNTQKP-LNHKNTDVIYASSKPIEGTDLQI
PHLARA_242564631    GPKTEALALAYDPKTKVIFFAEADTRQVSCWNTQKP-LNHKNTDVIYASAKPIEGTDLQI
PHLPER_76446591     GFHTEALALVYDPKTKVIFFAESDSRQVSCWNTQKP-LNHKNTDVIYASAKPIEGTDLQI
PHLARI_61817273     GPHSEALALAYDPKTKVIFFEYNSKKISCWNTIKKP-LIHDNMDKIYASPEFIEGTDISV
PHLPER_76446589     GSHSEALALAYDPKTKVIFFEYNSKRI SCWNTQKS-LNPDNIDVIYHSPDFIEGTDISM
PHLARG_74486543     GPYTEALTLVYDPKTKVIFFAESITRQVSCWNTQTP-LDSNHTDVIYSDARFIEGTDISV
PHLDUB_112361963    GYKTEALALAYDPKTKVIFFAESDSRQVSCWNIQKD-LKPNVGVITYNAYFVPGTDMV
PHLPAP_15963519     GFKTEALALAYDPKTKVIFFAESDSRQVSAWNIQKE-LIPKNVGVITYNAYFVPGTDMV
PHLDUB_112497236    GYKTEALALAYDPKTKVIFFAETDSRQVSCWNIKKE-LKPNVGVITYSSAKLNFGTDMV
PHLDUB_112361969    GYKTEALALAYDPKTKVIFFAETDSRQVSCWNIKKE-LKPNVGVITYSSAKLNFGTDMV
PHLPAP_15963517     GFKTEALALAYDPKTKVIFFAEADSRQVSCWNIKHE-LKPNVGVITYANFNFGTDMV
LUTLON_4887116     GKYTEALALAYDPKTKVIFFAESDSRQVSCWNVNME-LKPDNTDVIYSSARFIEGTDILV
LUTLON_41397462    GKYNDALALAYDPKTKVIFFAEANTQVSCWNTQKMLRKNNTDVVYTSRFFVPGTDLISV
LUTLON_77696451    GESTDRLGLVYDPKTKTIFVESNSKRVSCWNTQET-LNKDKIDVIYHNADFIEGTDLISI
:
:

PHLARI_61373243      DSDSQLWFLSNGGPPIDNLKLT---FDKPHIRLMRVD-TKNSIRRT-CEVKPIKPP--
PHLARA_242564631    DSESQWFLSNGGPPVENLKL3---FDKPHIRLMRVD-TEKSIIRTR-CEVKPIKPP--
PHLPER_76446591     DSESQWFLSNGGPPIPNLKLT---FDKPHIRLMRVD-TAKAIRTR-CEVKPRKP---
PHLARI_61817273     DSESKLWFFSNGGPPPIENLQLS---SDKPHIHLISVD-TEKAIKGT-CEVKA-----
PHLPER_76446589     DSESKLWFFSNGGPPPIENQLT---FDKPHFRLISMD-TKKSIGHGT-CEVKP-----
PHLARG_74486543     DSNSTLWVMNNGGPPVDDPDI VNE-FYKQIRLLYVD-TRKSIIRTR-CDVNGNKP----
PHLDUB_112361963    DADSTLWFMNNGGPPPTKIPKLE---FDKQIRLMKVP-THRAIRNL-CEMRKA-----
PHLPAP_15963519     DADSTLWFMNNGGPPTELPKLD---FDKQIRLMKVP-THRAIRNL-CEVRKPK-----
PHLDUB_112497236    DSKGFLWFMNNGGPPFD-EKMK---YEDPHIRLMKVK-TKKAIRGEKKGQ-----
PHLDUB_112361969    DSKGFLWFMNNGGPPFD-EKMK---YEDPHIRLMKVK-TKKAIRGEKKGQ-----
PHLPAP_15963517     DSKGFLWFMNNGGPPID-EKME---YDVPQIRLMKVK-TKKAIRGEKKGQ-----
LUTLON_4887116     DSKGMLWIMNNGGPPVEDQEKIWKMRVNRKIRIMKVD-TERVFKYSR-QNPYKPPKEI
LUTLON_41397462    DSKGGLWFMNNGGPPIRKSEKFK---YDFPRYRLRIMDTQEAIAGTA-CDMNA-----
LUTLON_77696451    DSQDNLWFLANGLPPLENSDKFV---FTKPRYQIFKVN-IQEAIAGTA-CEKNL-----
:
:
```

Fig S4

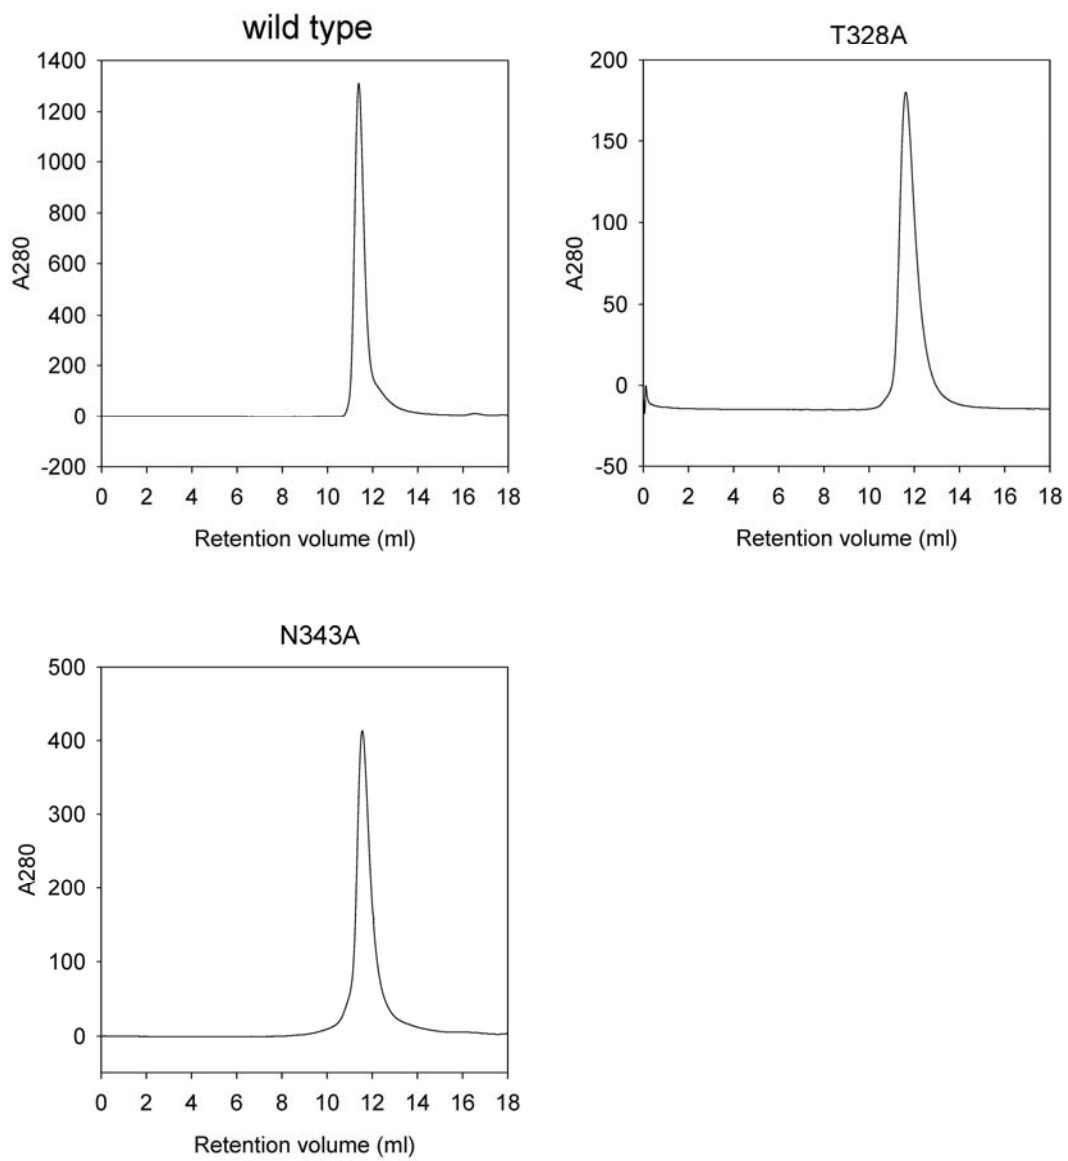



Table S1 – Characteristics of *Lutzomyia longipalpis* salivary proteins

| Sequence | Accession Number | Mature MW | pI   | Annotation             |
|----------|------------------|-----------|------|------------------------|
| LJM17    | AF132518         | 45.2      | 5.71 | yellow related-protein |
| LJM11    | AY445935         | 43.2      | 9.32 | yellow related-protein |
| LJM111   | DQ192488         | 43.0      | 4.85 | yellow related-protein |
| LJL23    | AF131933         | 35.0      | 9.14 | Apyrase                |
| LJL143   | AY445936         | 32.4      | 8.45 | Unknown                |
| LJL34    | AF132511         | 28.8      | 9.09 | Antigen-5              |
| LJL13    | AF420274         | 26.4      | 4.93 | D7-related protein     |
| LJM10    | DQ192486.1       | 16.6      | 8.61 | C-type lectin          |
| LJS142   | DQ192487.1       | 16.6      | 7.07 | C-type lectin          |
| LJL18    | DQ190947.1       | 16.3      | 6.49 | C-type lectin          |
| LJM04    | AAD32197.1       | 13.8      | 9.09 | SL1 protein            |
| LJL17    | AY452695         | 10.1      | 4.31 | Unknown                |
| LJS192   | AY438270.1       | 9.6       | 4.21 | Unknown                |
| LJL08    | M77090           | 6.9       | 8.91 | Maxadilan              |
| LJL201   | AY455919         | 8.6       | 4.86 | Unknown                |
| LJL38    | AY438269.1       | 2.5       | 3.34 | Unknown                |
